# Supplementary material
Source: publisher figshare collection journal article supplement (https://acs.figshare.com/ndownloader/files/18023549)

## **Supporting Information**

### **Benefits of High Resolution PM<sub>2.5</sub> Prediction using Satellite MAIAC AOD and Land Use Regression for Exposure Assessment: California Examples**

Hyung Joo Lee<sup>1,\*</sup>

<sup>1</sup>California Air Resources Board, 1001 I Street, Sacramento, California 95812, United States

Summary of contents: 9 pages, 2 figures, 4 tables

**Table S1.** The fixed and random effect estimates of the mixed effects model. The intercepts and slopes of random effects are demonstrated by standard deviations (SD). The (Week:Basin) and (Basin) represent PM<sub>2.5</sub>-AOD relationships that vary by every 3-week period within each air basin.

| <b>Fixed Effect<sup>a</sup></b> | <b>Estimate</b> | <b>SE</b> |
|---------------------------------|-----------------|-----------|
| Intercept                       | 4.35            | 0.44      |
| AOD                             | 12.44           | 2.29      |
| Temp                            | 0.054           | 0.005     |
| PBLH                            | -0.24           | 0.06      |
| Dist_Highways                   | -4.18           | 0.62      |
| Elevation                       | -1.81           | 0.10      |
| Dist_Coast                      | 0.95            | 0.10      |
| AADT                            | 0.0025          | 0.0004    |
| Develop_500m                    | 1.16            | 0.09      |
| <b>Random Effect</b>            | <b>Category</b> | <b>SD</b> |
| Date                            | Intercept       | 1.81      |
|                                 | AOD             | 18.08     |
| Week:Basin                      | Intercept       | 1.93      |
|                                 | AOD             | 16.93     |
| Basin                           | Intercept       | 1.42      |
|                                 | AOD             | 6.10      |

<sup>a</sup>The units of all the independent variables are following: AOD (unitless), Temp (temperature, °C), PBLH (planetary boundary layer height, km), Dist\_Highways (distance to highways, degree), Elevation (km), Dist\_Coast (distance to coast, degree), AADT (annual average daily traffic, ×1000 vehicles/day), and Develop\_500m (percent developed areas within 500 m buffers, ×100 %).

**Table S2.** Seasonal performance of the mixed effects model. Seasonal average measured and estimated PM<sub>2.5</sub> concentrations are compared. At least 10 pairs of measured and estimated PM<sub>2.5</sub> concentrations are used to calculate site-specific seasonal averages. The MAE and RMSE values are in the unit of  $\mu\text{g}/\text{m}^3$ .

| Season <sup>a</sup> | Model fit      |      |      | Site-based CV  |      |      | Obs-based CV   |      |      |
|---------------------|----------------|------|------|----------------|------|------|----------------|------|------|
|                     | R <sup>2</sup> | MAE  | RMSE | R <sup>2</sup> | MAE  | RMSE | R <sup>2</sup> | MAE  | RMSE |
| Winter              | 0.83           | 1.63 | 2.18 | 0.76           | 1.95 | 2.58 | 0.80           | 1.76 | 2.35 |
| Spring              | 0.64           | 1.06 | 1.30 | 0.49           | 1.28 | 1.56 | 0.60           | 1.12 | 1.37 |
| Summer              | 0.67           | 1.28 | 1.59 | 0.54           | 1.56 | 1.92 | 0.65           | 1.33 | 1.65 |
| Fall                | 0.83           | 1.01 | 1.29 | 0.75           | 1.26 | 1.57 | 0.81           | 1.07 | 1.36 |

<sup>a</sup>Winter: December-February; Spring: March-May; Summer: June-August; Fall: September-November.

**Table S3.** Comparisons of within-urban and between-urban variabilities of satellite-based PM<sub>2.5</sub> concentrations (Unit: µg/m<sup>3</sup>) by air basin. Within-urban and between-urban variabilities in the absolute term are in the unit of µg/m<sup>3</sup> while those in the relative term are unitless. Ratios are calculated as (between-urban variability/within-urban variability).

| Region             | Absolute     |               |       | Relative     |               |       |
|--------------------|--------------|---------------|-------|--------------|---------------|-------|
|                    | Within-Urban | Between-Urban | Ratio | Within-Urban | Between-Urban | Ratio |
| Statewide          | 2.42         | 6.95          | 2.871 | 0.29         | 0.81          | 2.807 |
| Bay Area           | 2.11         | 0.60          | 0.283 | 0.29         | 0.08          | 0.283 |
| San Joaquin Valley | 2.57         | 2.12          | 0.826 | 0.22         | 0.19          | 0.827 |
| South Coast        | 3.26         | 1.31          | 0.402 | 0.31         | 0.13          | 0.426 |

**Table S4.** Basin-specific population-weighted mean PM<sub>2.5</sub> concentrations (Unit: µg/m<sup>3</sup>) by the level of each demographic factor. The subgroups of ‘high’, ‘moderate’, and ‘low’ are defined as block groups with  $\geq 75^{\text{th}}$ ,  $25^{\text{th}} \leq < 75^{\text{th}}$ , and  $< 25^{\text{th}}$  percentiles of each demographic factor, respectively. Basins with  $< 10$  block groups in a specific level of a given demographic factor are not shown.

| Region              | Factor            | Low |                   | Moderate |                   | High |                   |
|---------------------|-------------------|-----|-------------------|----------|-------------------|------|-------------------|
|                     |                   | N   | PM <sub>2.5</sub> | N        | PM <sub>2.5</sub> | N    | PM <sub>2.5</sub> |
| Sacramento Valley   | % People of Color | 530 | 6.81              | 659      | 7.24              | 94   | 7.54              |
|                     | % Poverty         | 224 | 7.06              | 713      | 7.01              | 346  | 7.41              |
|                     | % Low Education   | 319 | 7.10              | 766      | 7.08              | 198  | 7.32              |
| San Diego County    | % People of Color | 301 | 8.51              | 531      | 8.62              | 153  | 8.89              |
|                     | % Poverty         | 290 | 8.56              | 538      | 8.63              | 157  | 8.83              |
|                     | % Low Education   | 334 | 8.61              | 502      | 8.59              | 149  | 8.90              |
| North Central Coast | % People of Color | 113 | 5.27              | 122      | 5.51              | 79   | 5.97              |
|                     | % Poverty         | 73  | 5.26              | 172      | 5.56              | 69   | 5.92              |
|                     | % Low Education   | 98  | 5.22              | 110      | 5.61              | 106  | 5.83              |
| Mojave Desert       | % People of Color | 97  | 6.25              | 291      | 6.98              | 82   | 7.19              |
|                     | % Poverty         | 34  | 6.91              | 215      | 6.84              | 221  | 7.05              |
|                     | % Low Education   | 38  | 6.78              | 288      | 6.87              | 144  | 7.11              |
| South Central Coast | % People of Color | 242 | 7.67              | 286      | 8.13              | 75   | 8.54              |
|                     | % Poverty         | 193 | 7.97              | 333      | 8.02              | 77   | 8.32              |
|                     | % Low Education   | 208 | 7.83              | 293      | 8.04              | 102  | 8.41              |
| Salton Sea          | % People of Color | 70  | 8.12              | 91       | 8.12              | 100  | 8.56              |
|                     | % Poverty         | 17  | 8.23              | 134      | 8.30              | 110  | 8.38              |
|                     | % Low Education   | 42  | 8.08              | 116      | 8.24              | 103  | 8.47              |

**Figure S1.** Spatial maps of demographic factors at the block-group level: (A) % people of color, (B) % poverty, and (C) % low educational attainment.

(A)

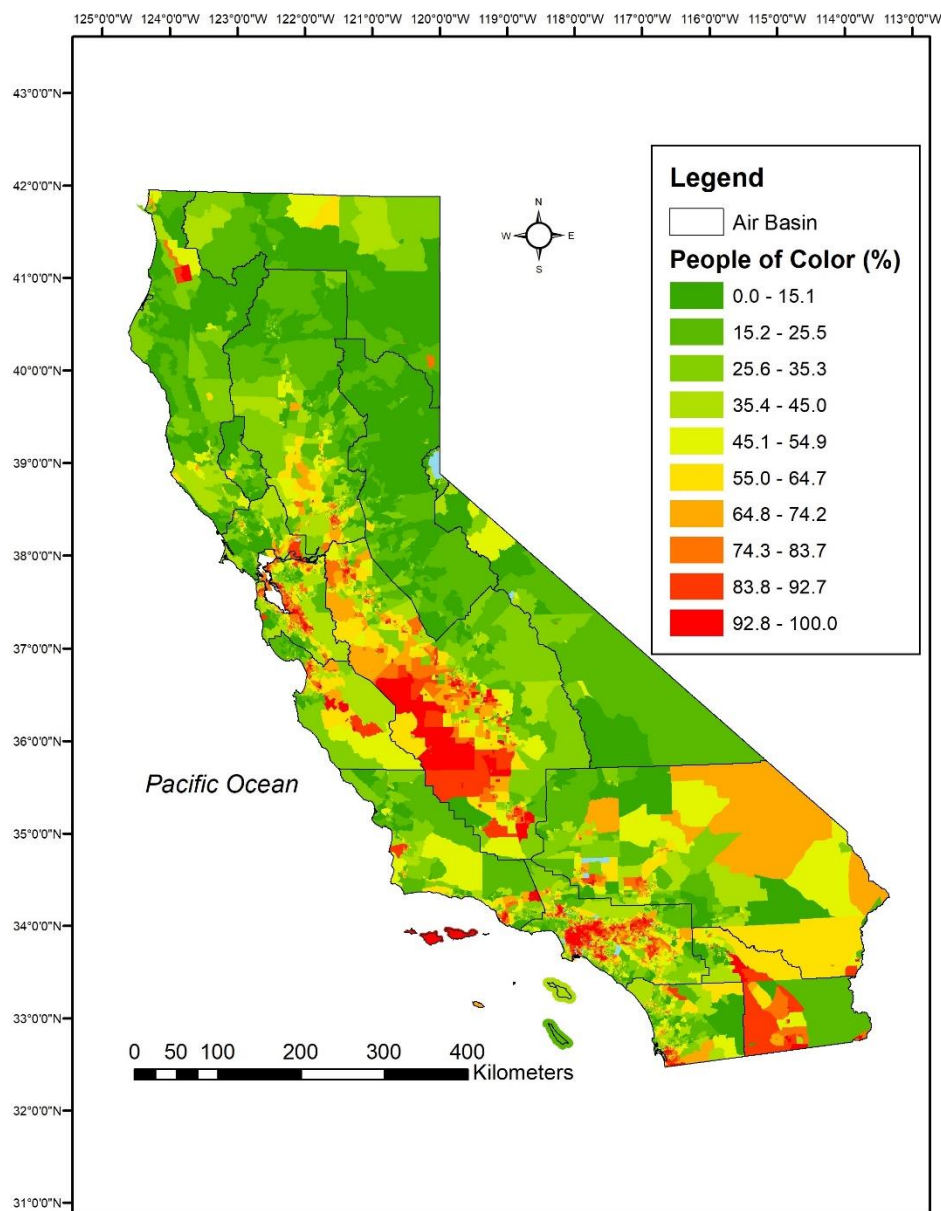

(B)

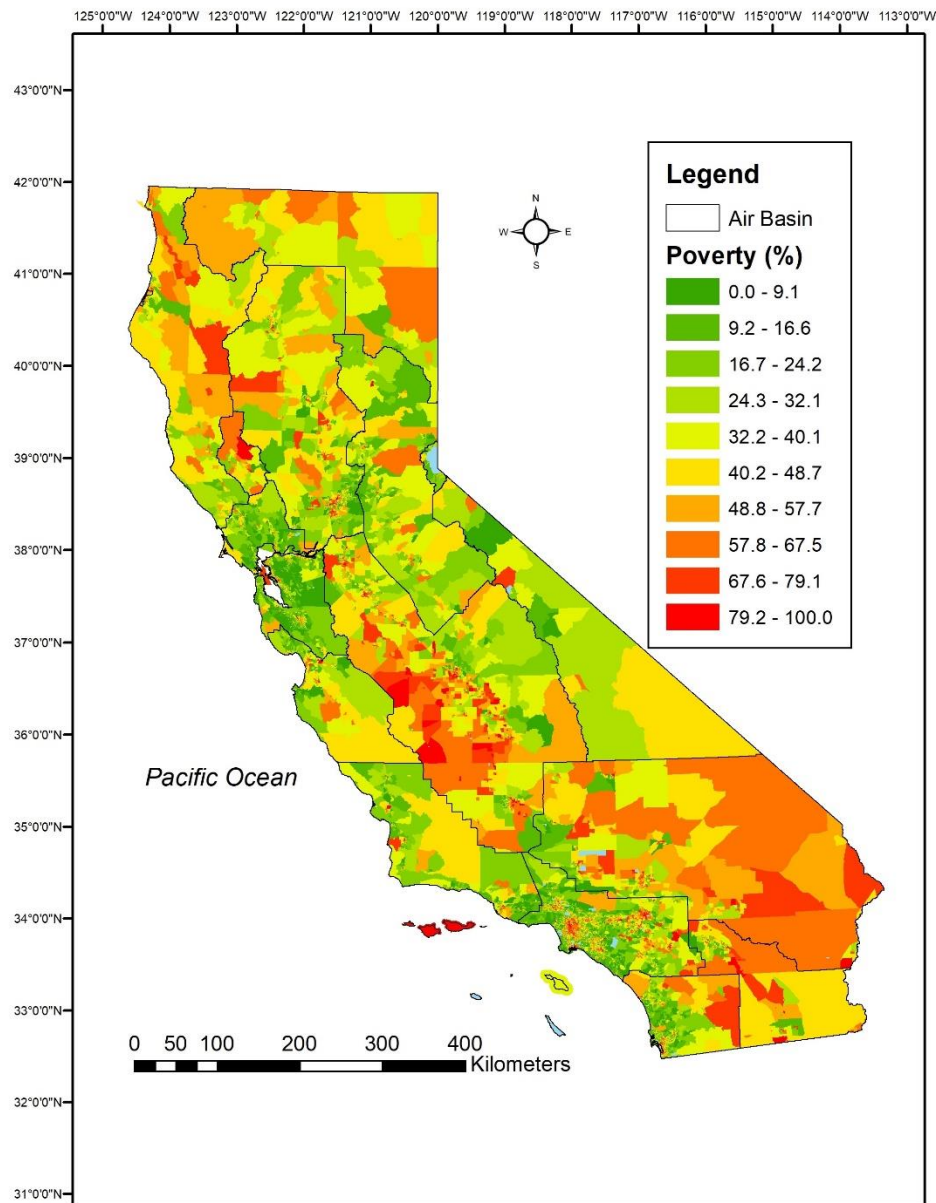

(C)

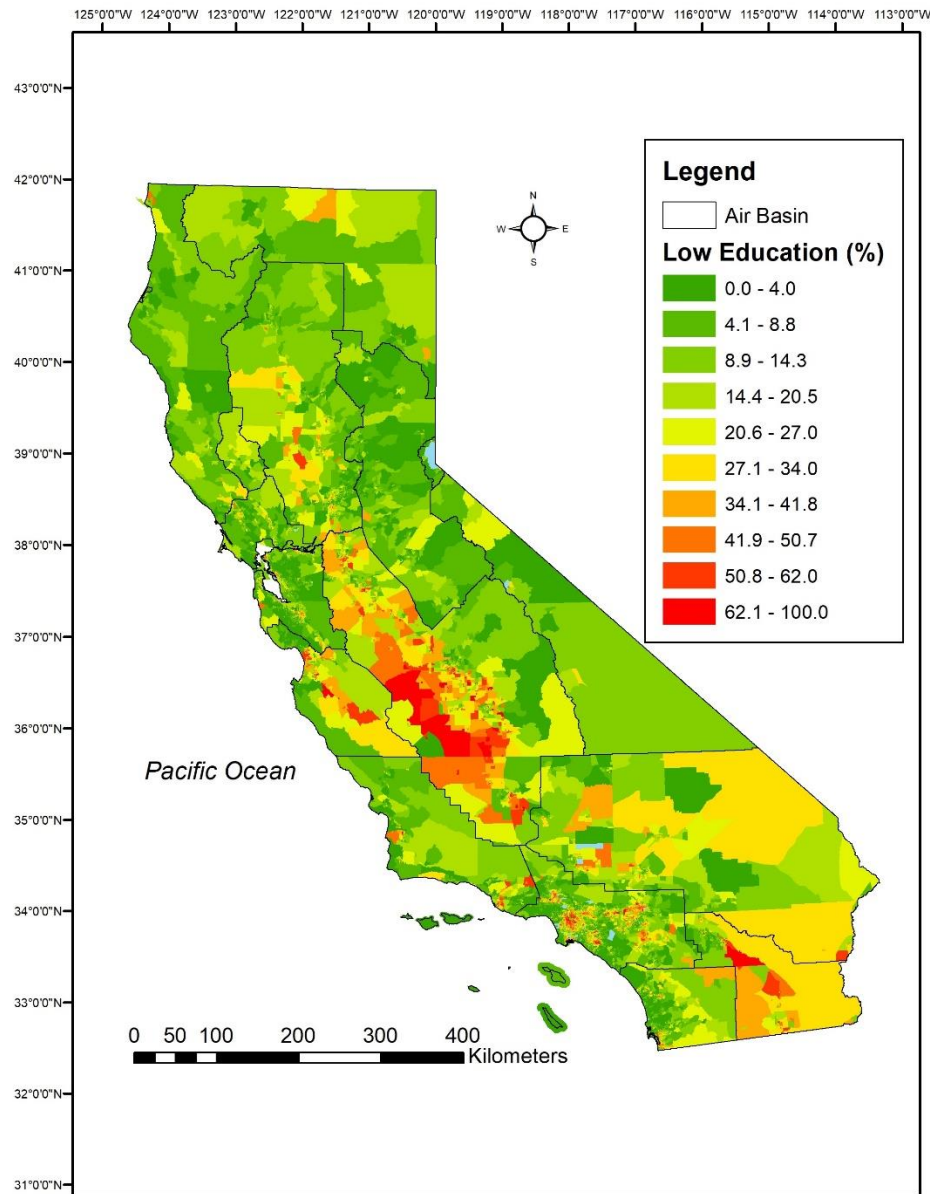



**Figure S2.** Forest plot showing within-urban and between-urban PM<sub>2.5</sub> variability. The means and interquartile ranges (25<sup>th</sup> to 75<sup>th</sup> percentiles) are in the unit of  $\mu\text{g}/\text{m}^3$ . The dashed vertical line displays arithmetic mean of urban-specific mean PM<sub>2.5</sub> concentrations.

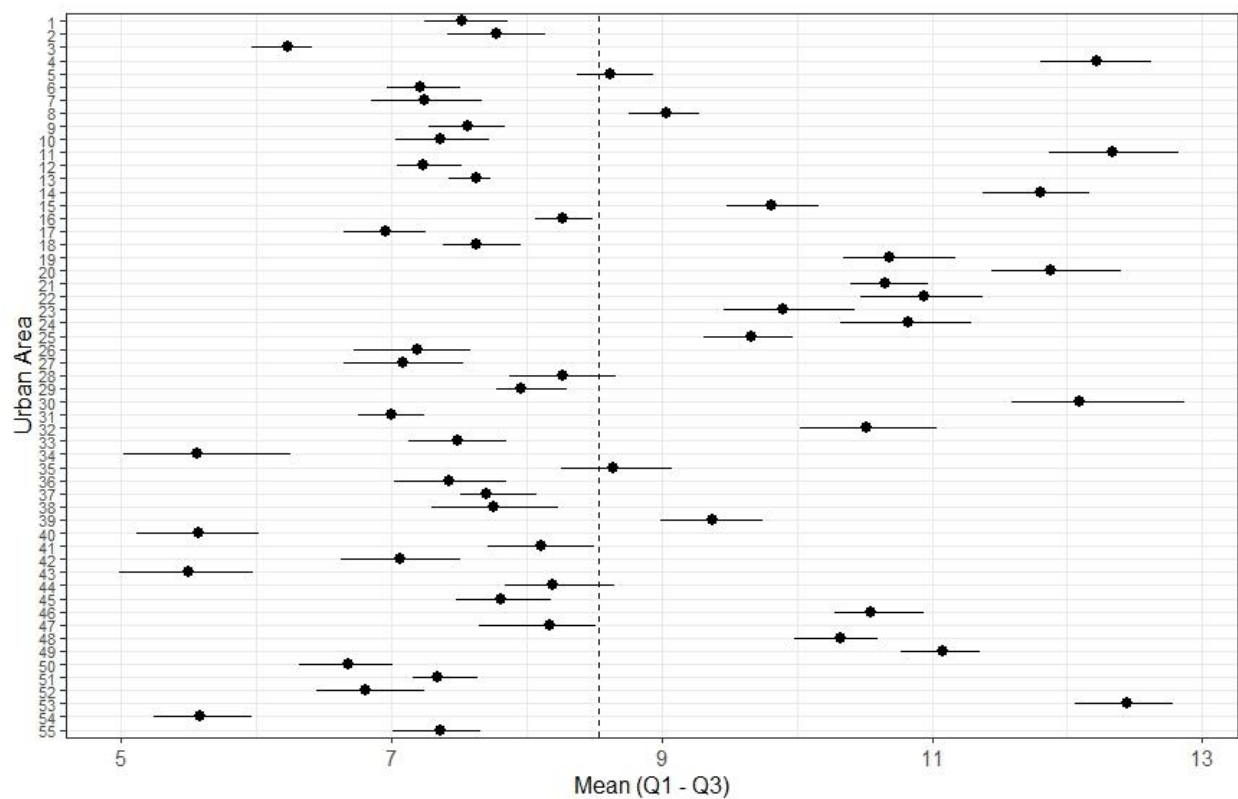

Supplement: Supplementary file 1 [file 18023549]
